# Supplementary material for: Comparison of inverted inner limiting membrane flap technique and traditional peeling for visual recovery and microscopic structural improvement in patients with macular holes: a meta-analysis
Source: Research Square preprint supplement (doi:10.21203/rs.3.rs-7927324/v1), 2025-11-28
Supplement: Supplementary file 1 [file 0eec1b0b54f441c23ae6b6e5.docx]

Search Strategy

| **1. Search strategy for PubMed** | |
| --- | --- |
| #1 | "Retinal Perforations"[MeSH Terms] OR "Retinal Breaks"[All Fields] OR "Retinal Perforation"[All Fields] OR "Retinal Break"[All Fields] OR "Retinal Hole"[All Fields] OR "Retinal Tears"[All Fields] OR "Retinal Tear"[All Fields] OR "Retinal Dialyses"[All Fields] OR "Macular Hole"[All Fields] OR "Retinal Holes"[All Fields] |
| #2 | "inverted internal limiting membrane flap technique"[All Fields] OR "inverted ILM flap technique"[All Fields] |
| #3 | "internal limiting membrane peeling"[All Fields] OR "ILM peeling"[All Fields] OR "ILM peel"[All Fields] |
| #4 | #1 AND #2 AND #3 |
| **2. Search strategy for Cochrane Library** | |
| #1 | MeSH descriptor: [Retinal Perforations] this term only |
| #2 | ("Retinal Breaks"):ti,ab,kw OR ("Retinal Dialyses"):ti,ab,kw OR ("Retinal Break"):ti,ab,kw OR ("Retinal Holes"):ti,ab,kw AND ("Retinal Tears"):ti,ab,kw |
| #3 | ("macular hole"):ti,ab,kw OR ("macular holes"):ti,ab,kw |
| #4 | #1 or #2 or #3 |
| #5 | ("inverted internal limiting membrane flap technique"):ti,ab,kw OR ("inverted ILM flap technique"):ti,ab,kw |
| #6 | ("internal limiting membrane peeling"):ti,ab,kw OR ("ILM peeling"):ti,ab,kw OR ("ILM peel"):ti,ab,kw OR (“internal limiting membrane removal”):ti,ab,kw OR (“removing the ILM”):ti,ab,kw |
| #7 | #4 and #5 and #6 |
